# Supplementary material for: Utility of Metagenomic Next-Generation Sequencing for Characterization of HIV and Human Pegivirus Diversity
Source: PLOS journal article supplement (doi:10.1371/journal.pone.0141723), 2015-11-23

# URF #28: CHU3903

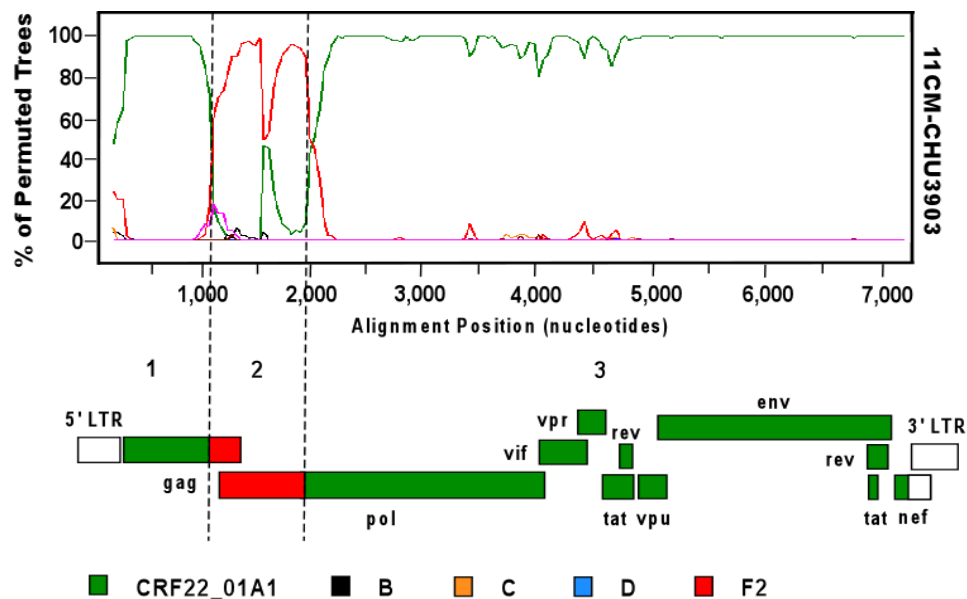

Fragment 1 (CRF22\_01A1)

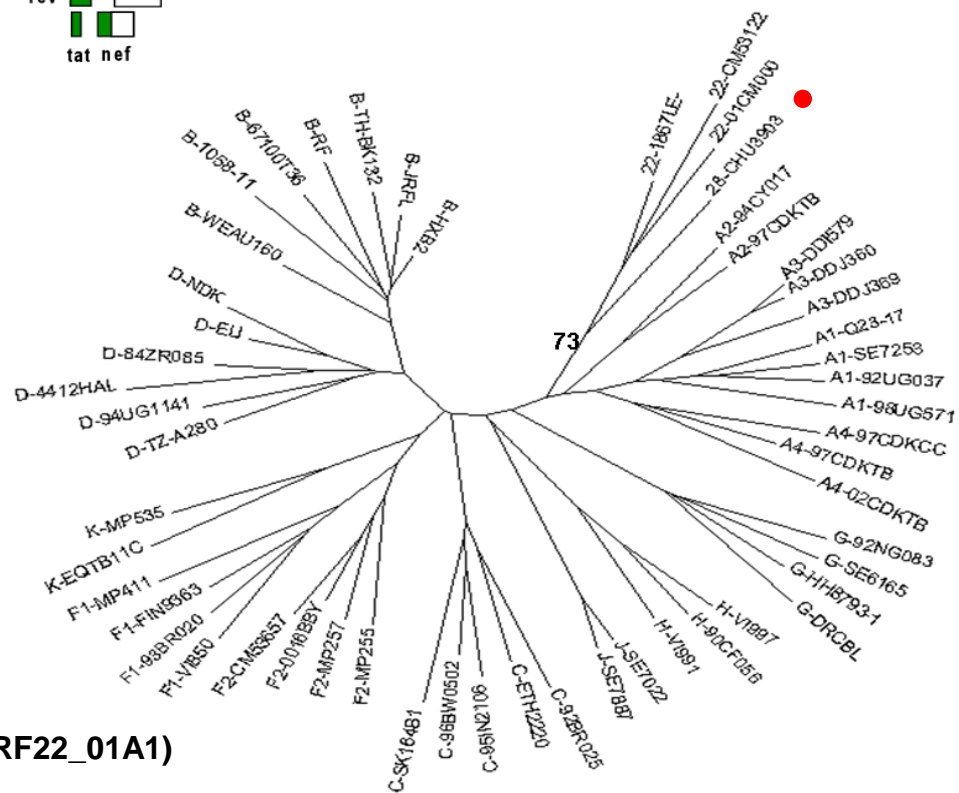

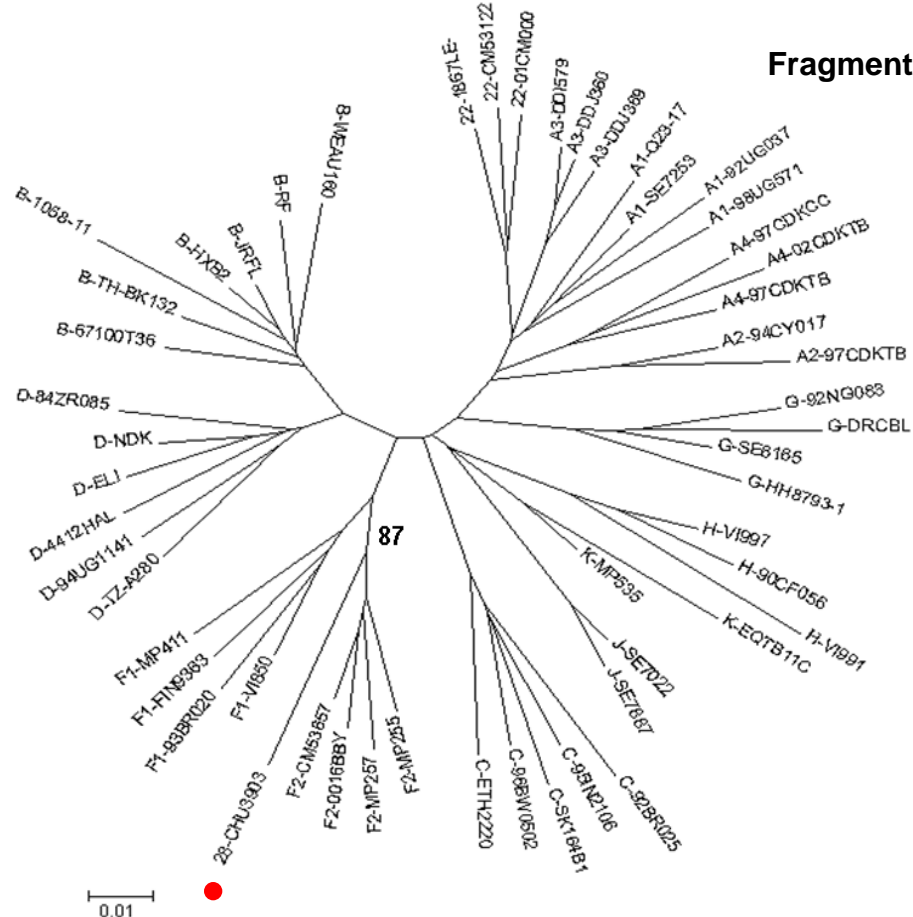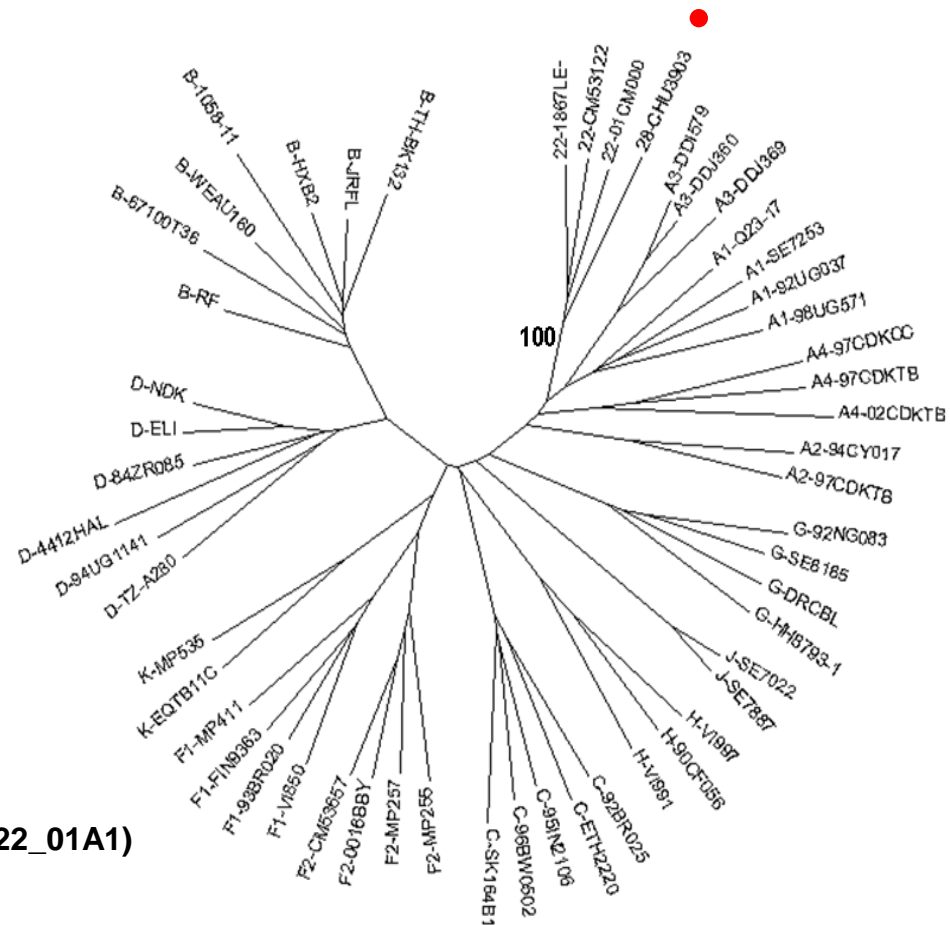

Supplement: S16 (10.1371/journal.pone.0141723.s016) [file journal.pone.0141723.s016]
